# Supplementary material
Source: PubMed Central journal article supplement (PMC6644494)
Supplement: ao7b00719_si_001.pdf [file ao7b00719_si_001.pdf]

## Supporting Information

Sea urchin spicule matrix proteins form mesoscale “smart” hydrogels that exhibit selective ion interactions.

*Martin Pendola,<sup>1</sup> Anastasia Davidyants,<sup>1</sup> Yong Seob Jung,<sup>1</sup> and John Spencer Evans<sup>1\*</sup>*

<sup>1</sup>Center for Skeletal Biology and Craniofacial Medicine, Laboratory for Chemical Physics, New York University College of Dentistry, 345 East 24<sup>th</sup> Street, New York, NY 10010 USA.

KEYWORDS: Sea urchin / spicule / calcite / ACC / hydrogels / intrinsic disorder / amyloid-like cross-beta strand / Biomineralization / AFM / Flow cytometry / diffusion coefficient / NMR

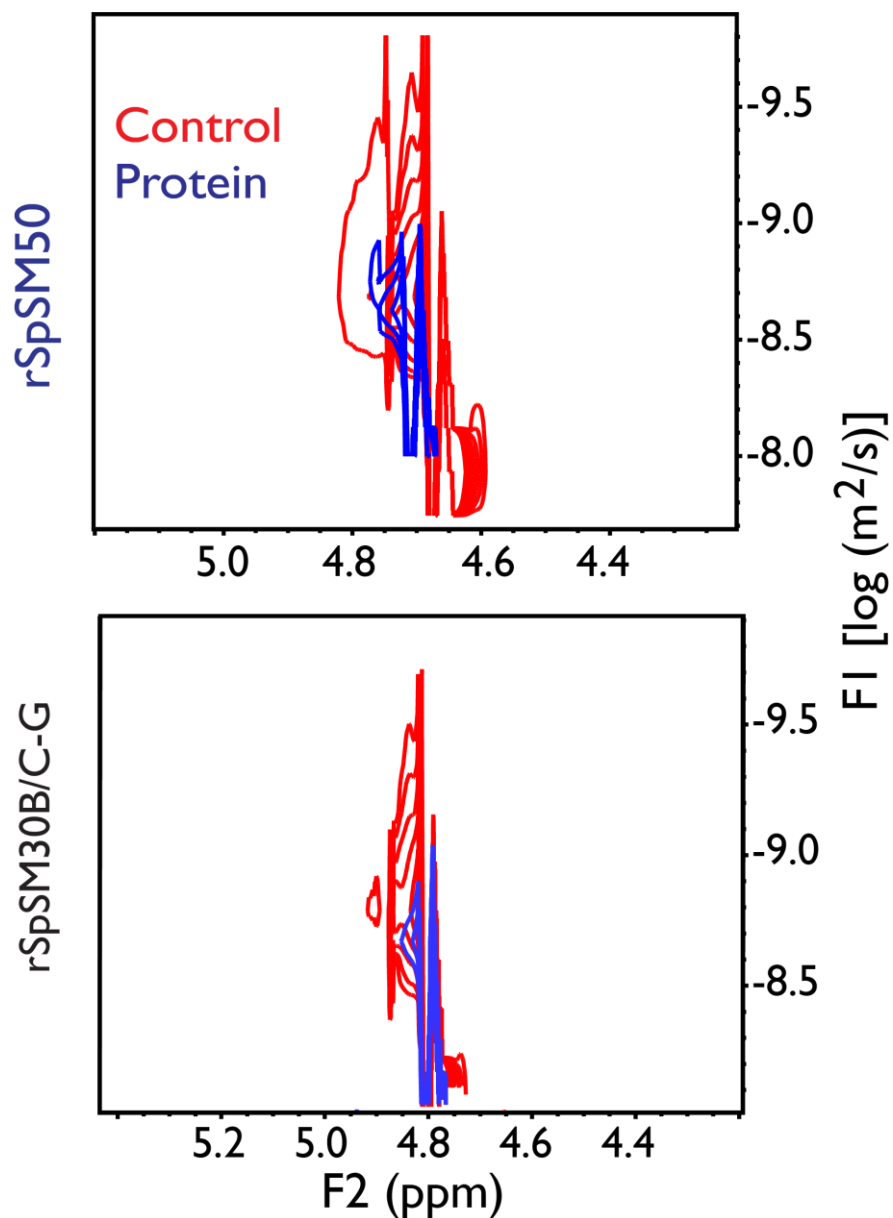

**Figure S1.** <sup>1</sup>H NMR 2-D DOSY spectra of (red) 90% H<sub>2</sub>O / 10% D<sub>2</sub>O with 133 µM d<sub>4</sub>-TSP, pH 8.0, and (blue) 22 µM rSpSM proteins in 90% H<sub>2</sub>O / 10% D<sub>2</sub>O with 133 µM d<sub>4</sub>-TSP, pH 8.0. The log of the diffusion coefficient is plotted on the y-axis (F1 domain) and determined from the contour plot maxima for each sample.
